# Supplementary material for: A novel 3D Cd(ii) metal–organic framework with an unprecedented (5,6)-connected topology based on isophthalate and 2-(3-pyridyl)imidazo[4,5-f]1,10-phenanthroline
Source: Royal Society of Chemistry journal article supplement (doi:10.1039/b907839h), 2009-01-01
Supplement: b907839h.pdf [file b907839h.pdf]

## Supporting Information

### A novel 3D Cd(II) metal-organic framework with an unprecedented (5,6)-connected topology based on isophthalate and 2-(3-pyridyl)imidazo[4,5-f]1,10-phenanthroline

Xiuli Wang\*, Guocheng Liu, Jinxia Zhang, Yongqiang Chen, Hongyan Lin, Wenyan Zheng

Faculty of Chemistry and Chemical Engineering, Bohai University, Jinzhou 121000, P. R. China

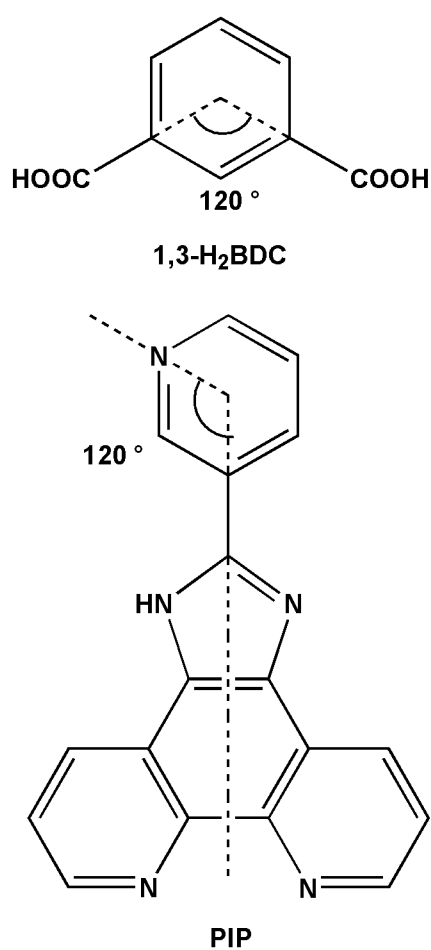

Scheme S1 The ligands used in this paper.

## Supporting Information

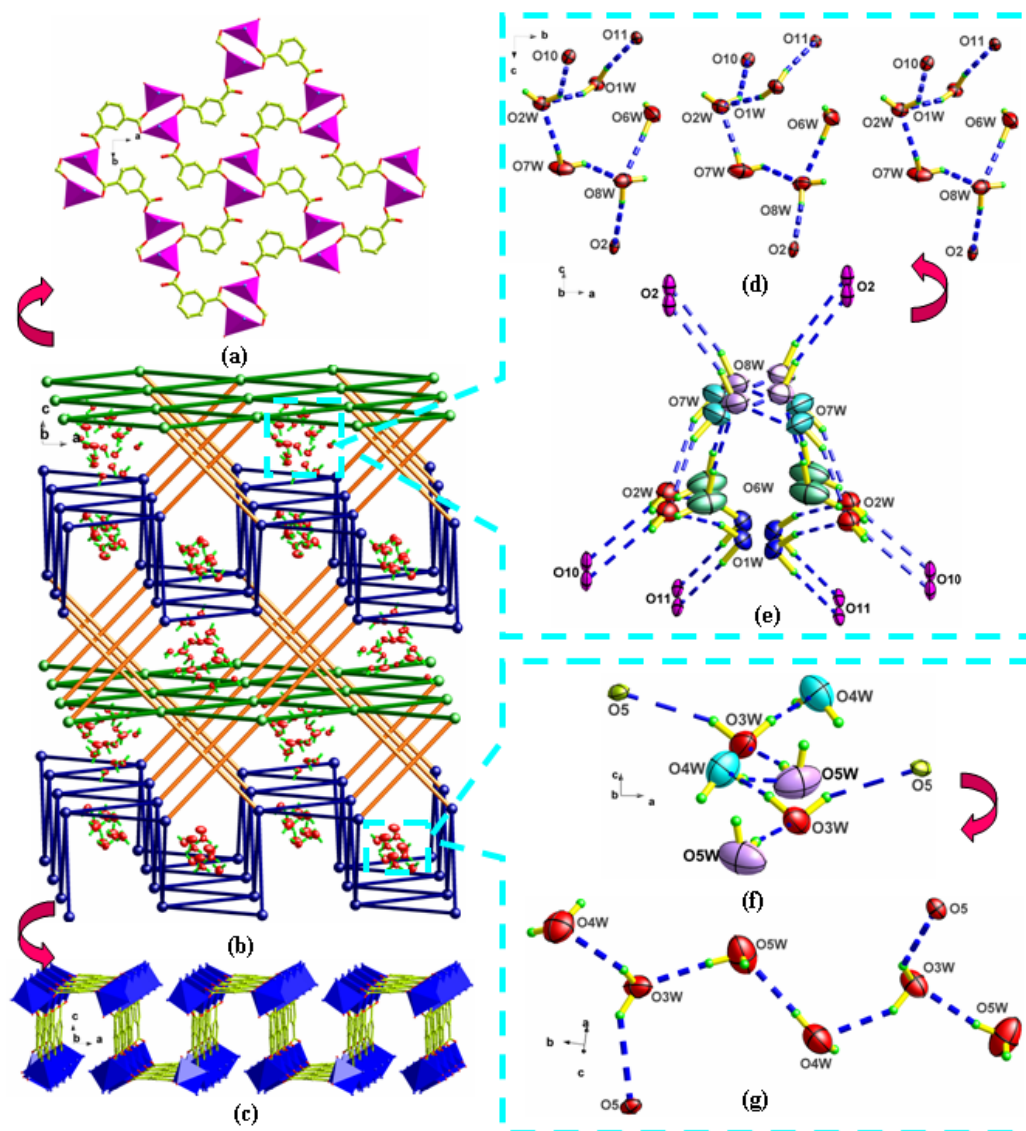

**Fig. S1** Schematic view of the 3D framework in **1**. (a) 2D planar SBU based on Cd(II)-1,3-BDC. (b) (5,6)-connected network with two kinds of 1D arrays of water molecules viewed along the *b* axis. (c) 2D flexuous SBU based on Cd(II)-1,3-BDC. (d) 1D supramolecular arrays of incompletely cyclic  $(\text{H}_2\text{O})_5$  water molecules viewed along the *a* axis, and (e) the *b* axis. (f) 1D zigzag water chain viewed along the *b* axis, and (g) about the *c* axis.

## Supporting Information

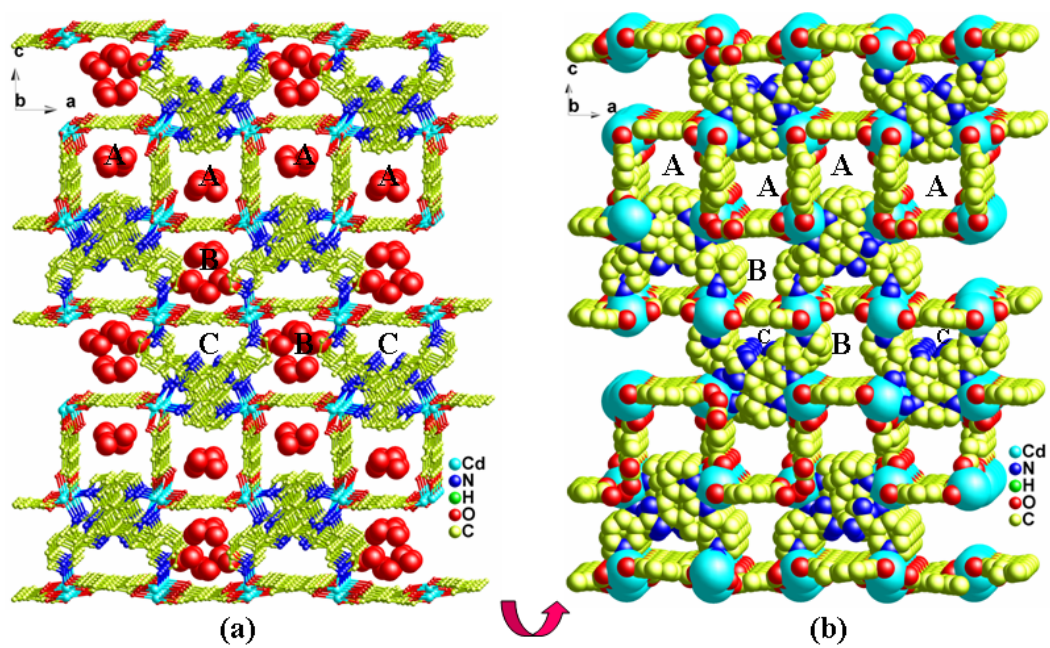

Fig. S2 View of 3-D framework with three kinds of 1-D channels.

## Supporting Information

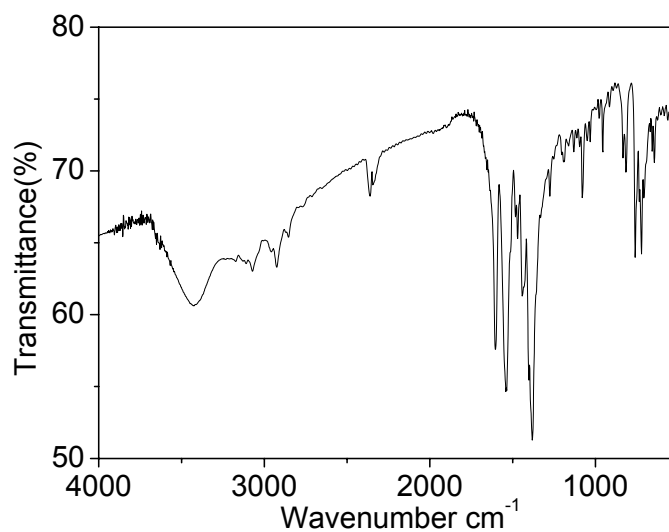

**Fig. S3** IR spectrum of **1**. Strong peaks at 1381, 1541 and 1604  $\text{cm}^{-1}$  are due to the vibrations of carboxylate groups. The bands in the range of 721–758  $\text{cm}^{-1}$  are assigned to the PIP ligands. The strong broad band at around 3423  $\text{cm}^{-1}$  was assigned to the vibrations of lattice water molecules in the compound.

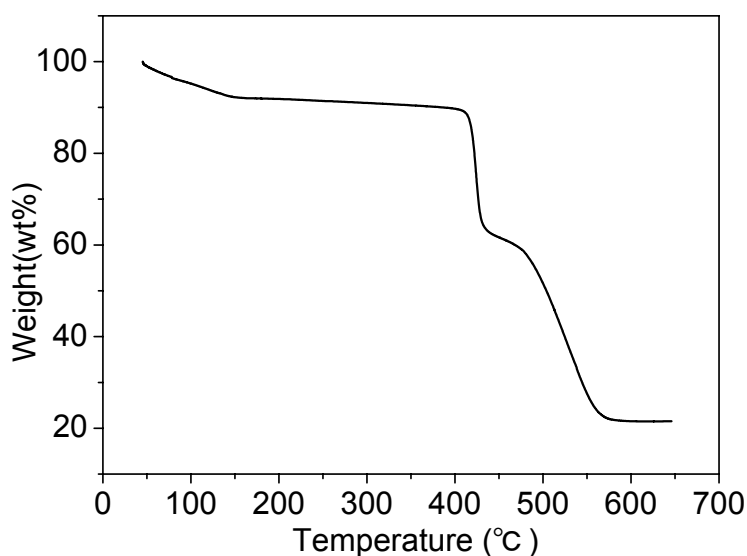

**Fig. S4** TG curve of **1**. The TG curve exhibits three weight loss stages in the range of 25–650  $^{\circ}\text{C}$ . The water molecules are eliminated from the framework (calcd. 9.18 %; found 9.21 %) when the temperature is increased from room temperature to about 170  $^{\circ}\text{C}$ . The second and the third weight loss in the range of 400~600  $^{\circ}\text{C}$  was attributed to the decomposition of the framework to form CdO as a final product. (calcd. 21.50 %; found 21.53 %).

## Supporting Information

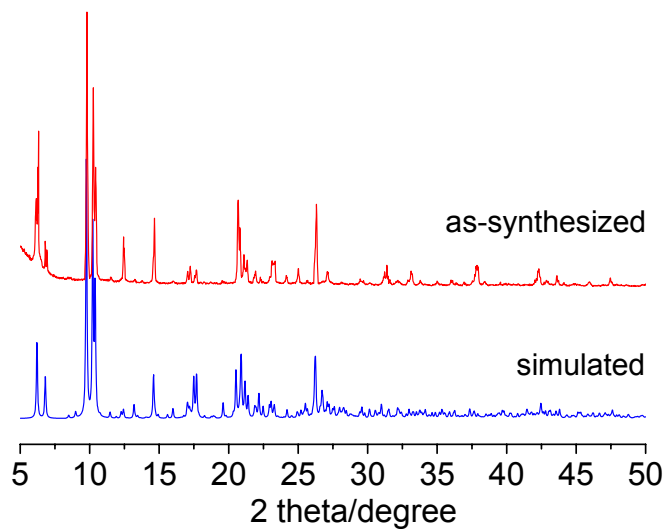

Fig. S5 Power XRD patterns of **1**.

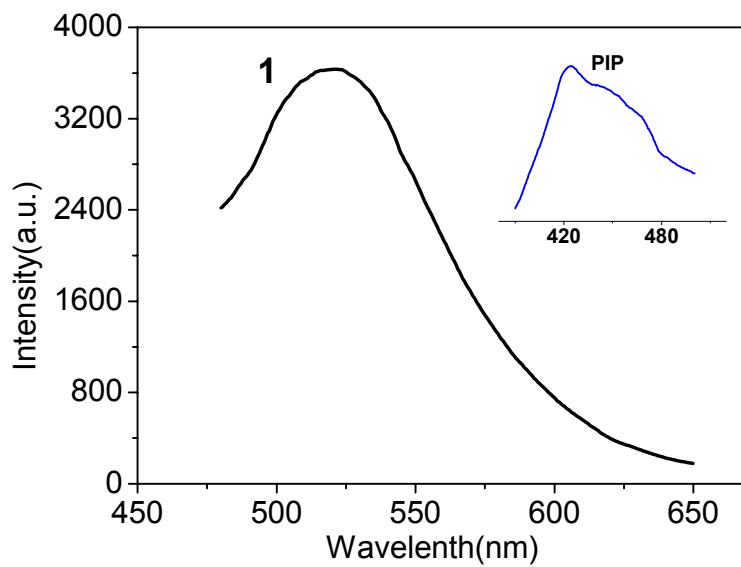

Fig. S6 Luminescence spectra of **1** in solid state.

## Supporting Information

Table S1. Selected Bond Distances (Å) and Angles (°) for Complex 1

|                    |            |                     |            |
|--------------------|------------|---------------------|------------|
| Cd(1)–O(7A)        | 2.225(3)   | Cd(1)–O(4)          | 2.257(3)   |
| Cd(1)–O(6)         | 2.286(3)   | Cd(1)–N(4)          | 2.311(3)   |
| Cd(1)–N(3)         | 2.358(3)   | Cd(2)–O(2)          | 2.206(3)   |
| Cd(2)–O(5)         | 2.230(3)   | Cd(2)–N(2)          | 2.278(3)   |
| Cd(2)–O(3)         | 2.286(3)   | Cd(2)–N(1)          | 2.320(3)   |
| Cd(3)–O(9B)        | 2.244(3)   | Cd(3)–O(11)         | 2.280(3)   |
| Cd(3)–N(9)         | 2.310(3)   | Cd(3)–N(10C)        | 2.315(3)   |
| Cd(3)–O(12C)       | 2.404(3)   |                     |            |
| O(7A)–Cd(1)–O(4)   | 91.32(12)  | O(7A)–Cd(1)–O(6)    | 87.80(12)  |
| O(4)–Cd(1)–O(6)    | 91.46(12)  | O(7A)–Cd(1)–N(4)    | 137.81(12) |
| O(4)–Cd(1)–N(4)    | 108.47(12) | O(6)–Cd(1)–N(4)     | 127.04(12) |
| O(7A)–Cd(1)–N(3)   | 91.03(12)  | O(4)–Cd(1)–N(3)     | 176.51(13) |
| O(6)–Cd(1)–N(3)    | 86.05(11)  | N(4)–Cd(1)–N(3)     | 71.30(11)  |
| O(2)–Cd(2)–O(5)    | 97.26(12)  | O(2)–Cd(2)–N(2)     | 97.75(12)  |
| O(5)–Cd(2)–N(2)    | 164.28(12) | O(2)–Cd(2)–O(3)     | 97.55(12)  |
| O(5)–Cd(2)–O(3)    | 99.21(12)  | N(2)–Cd(2)–O(3)     | 83.43(11)  |
| O(2)–Cd(2)–N(1)    | 135.33(12) | O(5)–Cd(2)–N(1)     | 92.62(12)  |
| N(2)–Cd(2)–N(1)    | 73.33(12)  | O(3)–Cd(2)–N(1)     | 123.69(12) |
| O(9B)–Cd(3)–O(11)  | 141.76(11) | O(9B)–Cd(3)–N(9)    | 95.41(11)  |
| O(11)–Cd(3)–N(9)   | 90.12(11)  | O(9B)–Cd(3)–N(10C)  | 89.08(11)  |
| O(11)–Cd(3)–N(10C) | 89.41(11)  | N(9)–Cd(3)–N(10C)   | 173.30(13) |
| O(9B)–Cd(3)–O(12C) | 86.70(10)  | O(11)–Cd(3)–O(12C)  | 131.39(10) |
| N(9)–Cd(3)–O(12C)  | 87.80(12)  | N(10C)–Cd(3)–O(12C) | 87.50(11)  |

Symmetry operations: A)  $-x + 3, y - 1/2, -z - 1/2$ ; B)  $x - 1/2, -y - 1/2, -z$ ; C)  $-x + 4, -y - 1,$

$-z$

## Supporting Information

Table S2. Hydrogen–Bonding Geometry (Å, °) for complex **1**

| D–H···A           | D–H  | H···A | D···A    | <D–H···A |
|-------------------|------|-------|----------|----------|
| O5W–H5WA···O3W(A) | 0.85 | 1.89  | 2.730(9) | 168      |
| O4W–H4WA···O5W    | 0.85 | 1.99  | 2.820(9) | 166      |
| O3W–H3WB···O4W    | 0.85 | 2.03  | 2.772(8) | 145      |
| O3W–H3WA···O5     | 0.85 | 2.29  | 2.979(6) | 139      |
| O6W–H6WB···O8W(B) | 0.85 | 2.01  | 2.853(7) | 174      |
| O7W–H7WB···O2W(C) | 0.85 | 2.05  | 2.845(6) | 156      |
| O1W–H1WB···O2W(C) | 0.85 | 2.10  | 2.925(5) | 163      |
| O7W–H7WA···O8W    | 0.85 | 2.27  | 2.885(8) | 129      |
| O8W–H8WA···O2(D)  | 0.85 | 2.18  | 3.012(6) | 166      |
| O2W–H2WA···O10    | 0.85 | 2.25  | 2.904(5) | 133      |
| O1W–H1WA···O11    | 0.85 | 1.99  | 2.834(5) | 170      |
| N6–H6A···O8(E)    | 0.88 | 1.93  | 2.792(4) | 166      |
| N8–H8B–O1(F)      | 0.88 | 1.98  | 2.839(4) | 164      |

Symmetry operations: A)  $5/2 - x, 1/2 + y, z$ ; B)  $9/2 - x, 1/2 + y, z$ ; C)  $-1/2 + x, -1/2 - y, -z$ ; D)  $1 + x, y, z$ ; E)  $1/2 + x, y, -1/2 - z$ ; F)  $7/2 - x, -1/2 + y, z$ .

## Supporting Information

### The coordinates and point symbols of each vertex

Atom coordinates (Here V1 = [Cd<sub>2</sub>N<sub>4</sub>O<sub>6</sub>] as 5-connected SBU and V2 = [Cd<sub>2</sub>N<sub>4</sub>O<sub>6</sub>] as 6-connected SBU)

| Name | x      | y      | z      |
|------|--------|--------|--------|
| V1   | 0.4790 | 0.4566 | 0.8269 |
| V2   | 0.5000 | 0.0000 | 0.0000 |

Connectivity of the selected node with coordinates and distances.

Atom V1 V2 links by bridge ligands and has Common vertex with R (A-A)

| Atom V1 composes cluster with | R (Å-Å) |         |        |          |          |
|-------------------------------|---------|---------|--------|----------|----------|
| V1                            | 0.0210  | 0.9566  | 0.8269 | ( 0 0 0) | 10.340 Å |
| V1                            | 0.0210  | -0.0434 | 0.8269 | ( 0-1 0) | 10.340 Å |
| V1                            | 0.5210  | -0.0434 | 0.6731 | ( 1-1 1) | 10.509 Å |
| V1                            | 0.5210  | 0.9566  | 0.6731 | ( 1 0 1) | 10.509 Å |
| V2                            | 1.0000  | 0.5000  | 1.0000 | ( 0 0 1) | 12.632 Å |

| Atom V2 composes cluster with | R (Å-Å) |         |         |          |          |
|-------------------------------|---------|---------|---------|----------|----------|
| V2                            | 0.0000  | -0.5000 | 0.0000  | (-1-1 0) | 10.889 Å |
| V2                            | 1.0000  | 0.5000  | 0.0000  | ( 0 0 0) | 10.889 Å |
| V2                            | 0.0000  | 0.5000  | 0.0000  | (-1 0 0) | 10.889 Å |
| V2                            | 1.0000  | -0.5000 | 0.0000  | ( 0-1 0) | 10.889 Å |
| V1                            | -0.0210 | 0.0434  | 0.1731  | (-1 0 1) | 12.632 Å |
| V1                            | 1.0210  | -0.0434 | -0.1731 | ( 1-1-1) | 12.632 Å |

Coordination sequences

| V1: | 1 | 2  | 3  | 4   | 5   | 6   | 7   | 8    | 9    | 10   |
|-----|---|----|----|-----|-----|-----|-----|------|------|------|
| Num | 5 | 17 | 46 | 99  | 160 | 228 | 316 | 417  | 530  | 659  |
| Cum | 6 | 23 | 69 | 168 | 328 | 556 | 872 | 1289 | 1819 | 2478 |

| V2: | 1 | 2  | 3  | 4   | 5   | 6   | 7   | 8    | 9    | 10   |
|-----|---|----|----|-----|-----|-----|-----|------|------|------|
| Num | 6 | 24 | 56 | 100 | 160 | 234 | 320 | 420  | 536  | 664  |
| Cum | 7 | 31 | 87 | 187 | 347 | 581 | 901 | 1321 | 1857 | 2521 |

Vertex symbols for selected sublattice

V1 Schläfli symbol: (4<sup>4</sup>.6<sup>6</sup>)

With circuits: [4.4.4.4.6<sub>3</sub>.6<sub>3</sub>.6<sub>5</sub>.6<sub>5</sub>.6<sub>5</sub>.6<sub>5</sub>]

V2 Schläfli symbol: (4<sup>4</sup>.6<sup>10</sup>.8)

With circuits: [4.4.4.4.6<sub>2</sub>.6<sub>2</sub>.6<sub>2</sub>.6<sub>2</sub>.6<sub>4</sub>.6<sub>4</sub>.6<sub>8</sub>.6<sub>8</sub>.6<sub>8</sub>.6<sub>8</sub>.8<sub>8</sub>]



## Supporting Information

---

### The highest symmetry embedding (or Systre key) of this new topology

Highest symmetry group and coordinates in the relaxed cell:

Group: *Cmca*

CELL: 1.48986 4.40042 1.31789 90.0000 90.0000 90.0000

NODE 15 0.00000 0.32555 0.00080

NODE 26 0.00000 0.00000 0.00000 (Explicit edges)

EDGE 0.00000 0.00000 0.00000 0.50000 0.00000 0.50000

EDGE 0.00000 0.32555 0.00080 0.50000 0.32555 -0.50080

EDGE 0.00000 0.00000 0.00000 0.00000 0.17445 -0.49920

EDGE 0.00000 0.32555 0.00080 0.50000 0.17445 -0.00080
